# Supplementary material for: Efficient mate finding in planktonic copepods swimming in turbulence
Source: eLife. 2020 Nov 25;9:e62014. doi: 10.7554/eLife.62014 (PMC7688315; doi:10.7554/eLife.62014)
Supplement: Figure 2—source data 1. [file elife-62014-fig2-data1.xlsx]

## Sheet: Copepods in calm water
	Separation (mm)	Clearance rate (cubic cm)
	1.25	0.0953
	1.75	0.1924
	2.25	0.3302
	2.75	0.5034
	3.25	0.7044
	3.75	0.9386
	4.25	1.195
	4.75	1.5027
	5.25	1.8411
	5.75	2.1966
	6.25	2.5962
	6.75	3.0211
	7.25	3.4795
	7.75	3.9532
	8.25	4.4547
	8.75	4.9998
	9.25	5.571
	9.75	6.185
	10.25	6.8274
	10.75	7.4791
	11.25	8.1637
	11.75	8.896
	12.25	9.6629
	12.75	10.4314
	13.25	11.1524
	13.75	11.9866
	14.25	12.8674
	14.75	13.6914
	15.25	14.5127
	15.75	15.4528
	16.25	16.3949
	16.75	17.314
	17.25	18.181
	17.75	19.1158
	18.25	20.0661
	18.75	21.0136
	19.25	21.9423
	19.75	22.9736

## Sheet: Copepods in turbulence
	Separation (mm)	Clearance rate (cubic cm)
	1.25	0.1093
	1.75	0.2485
	2.25	0.4421
	2.75	0.665
	3.25	0.9832
	3.75	1.3253
	4.25	1.7304
	4.75	2.2384
	5.25	2.7807
	5.75	3.3808
	6.25	4.0717
	6.75	4.846
	7.25	5.6582
	7.75	6.5424
	8.25	7.4838
	8.75	8.5147
	9.25	9.5642
	9.75	10.7337
	10.25	11.9053
	10.75	13.1166
	11.25	14.4966
	11.75	15.9007
	12.25	17.4429
	12.75	19.034
	13.25	20.4752
	13.75	22.1308
	14.25	23.8572
	14.75	25.7086
	15.25	27.5582
	15.75	29.4063
	16.25	31.4335
	16.75	33.2427
	17.25	35.3815
	17.75	37.3425
	18.25	39.807
	18.75	41.9025
	19.25	44.3091
	19.75	46.5357

## Sheet: Carcasses in turbulence
	Separation (mm)	Clearance rate (cubic cm)
	1.25	0.0331
	1.75	0.0879
	2.25	0.1756
	2.75	0.3007
	3.25	0.4696
	3.75	0.6799
	4.25	0.9391
	4.75	1.2577
	5.25	1.6326
	5.75	2.0586
	6.25	2.5288
	6.75	3.0624
	7.25	3.6562
	7.75	4.2975
	8.25	4.9874
	8.75	5.7319
	9.25	6.5524
	9.75	7.4177
	10.25	8.3551
	10.75	9.2878
	11.25	10.358
	11.75	11.4551
	12.25	12.6323
	12.75	13.817
	13.25	15.0698
	13.75	16.4084
	14.25	17.7984
	14.75	19.1968
	15.25	20.6925
	15.75	22.2589
	16.25	23.8336
	16.75	25.5127
	17.25	27.2202
	17.75	29.004
	18.25	30.9037
	18.75	32.8287
	19.25	34.7637
	19.75	36.8108

## Sheet: Tracers in turbulence
	Separation (mm)	Clearance rate (cubic cm)
	1.25	0.0239
	1.75	0.0598
	2.25	0.1188
	2.75	0.2053
	3.25	0.3238
	3.75	0.4748
	4.25	0.6637
	4.75	0.8927
	5.25	1.1596
	5.75	1.4679
	6.25	1.8165
	6.75	2.2078
	7.25	2.6408
	7.75	3.1182
	8.25	3.6358
	8.75	4.1986
	9.25	4.8046
	9.75	5.454
	10.25	6.1428
	10.75	6.8736
	11.25	7.6599
	11.75	8.4789
	12.25	9.3473
	12.75	10.2601
	13.25	11.2148
	13.75	12.2156
	14.25	13.2598
	14.75	14.3487
	15.25	15.4876
	15.75	16.6635
	16.25	17.8851
	16.75	19.1594
	17.25	20.4723
	17.75	21.8387
	18.25	23.2457
	18.75	24.6997
	19.25	26.2081
	19.75	27.7562
