# Supplementary material for: Efficient mate finding in planktonic copepods swimming in turbulence
Source: eLife. 2020 Nov 25;9:e62014. doi: 10.7554/eLife.62014 (PMC7688315; doi:10.7554/eLife.62014)
Supplement: Figure 3—source data 1. [file elife-62014-fig3-data1.xlsx]

## Sheet: X grid (separation)
1.25	1.75	2.25	2.75	3.25	3.75	4.25	4.75	5.25	5.75	6.25	6.75	7.25	7.75	8.25	8.75	9.25	9.75
1.25	1.75	2.25	2.75	3.25	3.75	4.25	4.75	5.25	5.75	6.25	6.75	7.25	7.75	8.25	8.75	9.25	9.75
1.25	1.75	2.25	2.75	3.25	3.75	4.25	4.75	5.25	5.75	6.25	6.75	7.25	7.75	8.25	8.75	9.25	9.75
1.25	1.75	2.25	2.75	3.25	3.75	4.25	4.75	5.25	5.75	6.25	6.75	7.25	7.75	8.25	8.75	9.25	9.75
1.25	1.75	2.25	2.75	3.25	3.75	4.25	4.75	5.25	5.75	6.25	6.75	7.25	7.75	8.25	8.75	9.25	9.75
1.25	1.75	2.25	2.75	3.25	3.75	4.25	4.75	5.25	5.75	6.25	6.75	7.25	7.75	8.25	8.75	9.25	9.75
1.25	1.75	2.25	2.75	3.25	3.75	4.25	4.75	5.25	5.75	6.25	6.75	7.25	7.75	8.25	8.75	9.25	9.75
1.25	1.75	2.25	2.75	3.25	3.75	4.25	4.75	5.25	5.75	6.25	6.75	7.25	7.75	8.25	8.75	9.25	9.75
1.25	1.75	2.25	2.75	3.25	3.75	4.25	4.75	5.25	5.75	6.25	6.75	7.25	7.75	8.25	8.75	9.25	9.75
1.25	1.75	2.25	2.75	3.25	3.75	4.25	4.75	5.25	5.75	6.25	6.75	7.25	7.75	8.25	8.75	9.25	9.75
1.25	1.75	2.25	2.75	3.25	3.75	4.25	4.75	5.25	5.75	6.25	6.75	7.25	7.75	8.25	8.75	9.25	9.75
1.25	1.75	2.25	2.75	3.25	3.75	4.25	4.75	5.25	5.75	6.25	6.75	7.25	7.75	8.25	8.75	9.25	9.75
1.25	1.75	2.25	2.75	3.25	3.75	4.25	4.75	5.25	5.75	6.25	6.75	7.25	7.75	8.25	8.75	9.25	9.75
1.25	1.75	2.25	2.75	3.25	3.75	4.25	4.75	5.25	5.75	6.25	6.75	7.25	7.75	8.25	8.75	9.25	9.75
1.25	1.75	2.25	2.75	3.25	3.75	4.25	4.75	5.25	5.75	6.25	6.75	7.25	7.75	8.25	8.75	9.25	9.75
1.25	1.75	2.25	2.75	3.25	3.75	4.25	4.75	5.25	5.75	6.25	6.75	7.25	7.75	8.25	8.75	9.25	9.75
1.25	1.75	2.25	2.75	3.25	3.75	4.25	4.75	5.25	5.75	6.25	6.75	7.25	7.75	8.25	8.75	9.25	9.75
1.25	1.75	2.25	2.75	3.25	3.75	4.25	4.75	5.25	5.75	6.25	6.75	7.25	7.75	8.25	8.75	9.25	9.75
1.25	1.75	2.25	2.75	3.25	3.75	4.25	4.75	5.25	5.75	6.25	6.75	7.25	7.75	8.25	8.75	9.25	9.75
1.25	1.75	2.25	2.75	3.25	3.75	4.25	4.75	5.25	5.75	6.25	6.75	7.25	7.75	8.25	8.75	9.25	9.75

## Sheet: Y grid (velocity)
-9.5	-9.5	-9.5	-9.5	-9.5	-9.5	-9.5	-9.5	-9.5	-9.5	-9.5	-9.5	-9.5	-9.5	-9.5	-9.5	-9.5	-9.5
-8.5	-8.5	-8.5	-8.5	-8.5	-8.5	-8.5	-8.5	-8.5	-8.5	-8.5	-8.5	-8.5	-8.5	-8.5	-8.5	-8.5	-8.5
-7.5	-7.5	-7.5	-7.5	-7.5	-7.5	-7.5	-7.5	-7.5	-7.5	-7.5	-7.5	-7.5	-7.5	-7.5	-7.5	-7.5	-7.5
-6.5	-6.5	-6.5	-6.5	-6.5	-6.5	-6.5	-6.5	-6.5	-6.5	-6.5	-6.5	-6.5	-6.5	-6.5	-6.5	-6.5	-6.5
-5.5	-5.5	-5.5	-5.5	-5.5	-5.5	-5.5	-5.5	-5.5	-5.5	-5.5	-5.5	-5.5	-5.5	-5.5	-5.5	-5.5	-5.5
-4.5	-4.5	-4.5	-4.5	-4.5	-4.5	-4.5	-4.5	-4.5	-4.5	-4.5	-4.5	-4.5	-4.5	-4.5	-4.5	-4.5	-4.5
-3.5	-3.5	-3.5	-3.5	-3.5	-3.5	-3.5	-3.5	-3.5	-3.5	-3.5	-3.5	-3.5	-3.5	-3.5	-3.5	-3.5	-3.5
-2.5	-2.5	-2.5	-2.5	-2.5	-2.5	-2.5	-2.5	-2.5	-2.5	-2.5	-2.5	-2.5	-2.5	-2.5	-2.5	-2.5	-2.5
-1.5	-1.5	-1.5	-1.5	-1.5	-1.5	-1.5	-1.5	-1.5	-1.5	-1.5	-1.5	-1.5	-1.5	-1.5	-1.5	-1.5	-1.5
-0.5	-0.5	-0.5	-0.5	-0.5	-0.5	-0.5	-0.5	-0.5	-0.5	-0.5	-0.5	-0.5	-0.5	-0.5	-0.5	-0.5	-0.5
0.5	0.5	0.5	0.5	0.5	0.5	0.5	0.5	0.5	0.5	0.5	0.5	0.5	0.5	0.5	0.5	0.5	0.5
1.5	1.5	1.5	1.5	1.5	1.5	1.5	1.5	1.5	1.5	1.5	1.5	1.5	1.5	1.5	1.5	1.5	1.5
2.5	2.5	2.5	2.5	2.5	2.5	2.5	2.5	2.5	2.5	2.5	2.5	2.5	2.5	2.5	2.5	2.5	2.5
3.5	3.5	3.5	3.5	3.5	3.5	3.5	3.5	3.5	3.5	3.5	3.5	3.5	3.5	3.5	3.5	3.5	3.5
4.5	4.5	4.5	4.5	4.5	4.5	4.5	4.5	4.5	4.5	4.5	4.5	4.5	4.5	4.5	4.5	4.5	4.5
5.5	5.5	5.5	5.5	5.5	5.5	5.5	5.5	5.5	5.5	5.5	5.5	5.5	5.5	5.5	5.5	5.5	5.5
6.5	6.5	6.5	6.5	6.5	6.5	6.5	6.5	6.5	6.5	6.5	6.5	6.5	6.5	6.5	6.5	6.5	6.5
7.5	7.5	7.5	7.5	7.5	7.5	7.5	7.5	7.5	7.5	7.5	7.5	7.5	7.5	7.5	7.5	7.5	7.5
8.5	8.5	8.5	8.5	8.5	8.5	8.5	8.5	8.5	8.5	8.5	8.5	8.5	8.5	8.5	8.5	8.5	8.5
9.5	9.5	9.5	9.5	9.5	9.5	9.5	9.5	9.5	9.5	9.5	9.5	9.5	9.5	9.5	9.5	9.5	9.5

## Sheet: Y grid (angle)
-0.95	-0.95	-0.95	-0.95	-0.95	-0.95	-0.95	-0.95	-0.95	-0.95	-0.95	-0.95	-0.95	-0.95	-0.95	-0.95	-0.95	-0.95
-0.85	-0.85	-0.85	-0.85	-0.85	-0.85	-0.85	-0.85	-0.85	-0.85	-0.85	-0.85	-0.85	-0.85	-0.85	-0.85	-0.85	-0.85
-0.75	-0.75	-0.75	-0.75	-0.75	-0.75	-0.75	-0.75	-0.75	-0.75	-0.75	-0.75	-0.75	-0.75	-0.75	-0.75	-0.75	-0.75
-0.65	-0.65	-0.65	-0.65	-0.65	-0.65	-0.65	-0.65	-0.65	-0.65	-0.65	-0.65	-0.65	-0.65	-0.65	-0.65	-0.65	-0.65
-0.55	-0.55	-0.55	-0.55	-0.55	-0.55	-0.55	-0.55	-0.55	-0.55	-0.55	-0.55	-0.55	-0.55	-0.55	-0.55	-0.55	-0.55
-0.45	-0.45	-0.45	-0.45	-0.45	-0.45	-0.45	-0.45	-0.45	-0.45	-0.45	-0.45	-0.45	-0.45	-0.45	-0.45	-0.45	-0.45
-0.35	-0.35	-0.35	-0.35	-0.35	-0.35	-0.35	-0.35	-0.35	-0.35	-0.35	-0.35	-0.35	-0.35	-0.35	-0.35	-0.35	-0.35
-0.25	-0.25	-0.25	-0.25	-0.25	-0.25	-0.25	-0.25	-0.25	-0.25	-0.25	-0.25	-0.25	-0.25	-0.25	-0.25	-0.25	-0.25
-0.15	-0.15	-0.15	-0.15	-0.15	-0.15	-0.15	-0.15	-0.15	-0.15	-0.15	-0.15	-0.15	-0.15	-0.15	-0.15	-0.15	-0.15
-0.05	-0.05	-0.05	-0.05	-0.05	-0.05	-0.05	-0.05	-0.05	-0.05	-0.05	-0.05	-0.05	-0.05	-0.05	-0.05	-0.05	-0.05
0.05	0.05	0.05	0.05	0.05	0.05	0.05	0.05	0.05	0.05	0.05	0.05	0.05	0.05	0.05	0.05	0.05	0.05
0.15	0.15	0.15	0.15	0.15	0.15	0.15	0.15	0.15	0.15	0.15	0.15	0.15	0.15	0.15	0.15	0.15	0.15
0.25	0.25	0.25	0.25	0.25	0.25	0.25	0.25	0.25	0.25	0.25	0.25	0.25	0.25	0.25	0.25	0.25	0.25
0.35	0.35	0.35	0.35	0.35	0.35	0.35	0.35	0.35	0.35	0.35	0.35	0.35	0.35	0.35	0.35	0.35	0.35
0.45	0.45	0.45	0.45	0.45	0.45	0.45	0.45	0.45	0.45	0.45	0.45	0.45	0.45	0.45	0.45	0.45	0.45
0.55	0.55	0.55	0.55	0.55	0.55	0.55	0.55	0.55	0.55	0.55	0.55	0.55	0.55	0.55	0.55	0.55	0.55
0.65	0.65	0.65	0.65	0.65	0.65	0.65	0.65	0.65	0.65	0.65	0.65	0.65	0.65	0.65	0.65	0.65	0.65
0.75	0.75	0.75	0.75	0.75	0.75	0.75	0.75	0.75	0.75	0.75	0.75	0.75	0.75	0.75	0.75	0.75	0.75
0.85	0.85	0.85	0.85	0.85	0.85	0.85	0.85	0.85	0.85	0.85	0.85	0.85	0.85	0.85	0.85	0.85	0.85
0.95	0.95	0.95	0.95	0.95	0.95	0.95	0.95	0.95	0.95	0.95	0.95	0.95	0.95	0.95	0.95	0.95	0.95

## Sheet: Copepods calm water (velocity)
0.00725483	0.00798988	0.00851615	0.00911849	0.00890605	0.00885945	0.00889784	0.00882254	0.00897357	0.00885788	0.00876667	0.00879978	0.00872848	0.00867227	0.00861337	0.0085565	0.0085535	0.00853496
0.0097681	0.0104133	0.0112118	0.0115045	0.011347	0.0115673	0.0113999	0.0113456	0.0112109	0.011307	0.0112345	0.011276	0.0112322	0.0110894	0.0110099	0.0110546	0.0110527	0.0108688
0.0135251	0.0140291	0.0150533	0.0151985	0.0153091	0.0150828	0.0149964	0.014958	0.0148925	0.0150098	0.0149927	0.0147788	0.0147707	0.0147646	0.0146244	0.0144206	0.0145395	0.0144011
0.0199119	0.0204687	0.0205862	0.0211784	0.0204696	0.0205878	0.020211	0.0204507	0.0204117	0.0202173	0.0201622	0.0202168	0.0200508	0.0199782	0.0198133	0.0197436	0.019734	0.0195504
0.0294339	0.0304135	0.0291685	0.0301148	0.0285305	0.0282233	0.0279883	0.0283147	0.0284056	0.0282354	0.0280125	0.0281822	0.0278848	0.0278491	0.0276497	0.0277525	0.0275264	0.027204
0.044954	0.0433694	0.0433614	0.0415222	0.0404662	0.0396351	0.0392265	0.0397178	0.0396104	0.0391554	0.0393434	0.0394161	0.0390588	0.0391982	0.0392327	0.0390533	0.0386999	0.0385896
0.0668092	0.0612827	0.0587434	0.0578614	0.0557385	0.0552059	0.0543303	0.0552135	0.054435	0.0545038	0.0545168	0.054444	0.054257	0.0547599	0.0545655	0.0541433	0.0543328	0.0543044
0.092784	0.0846646	0.0803453	0.0758356	0.0740878	0.0738202	0.0735706	0.0733316	0.0727892	0.0726976	0.0731735	0.0724011	0.0722794	0.0728012	0.0727643	0.0725041	0.0730226	0.0730807
0.120417	0.106292	0.0993269	0.0942503	0.0923824	0.0917504	0.0920092	0.0910859	0.091013	0.0911287	0.0909069	0.090707	0.0902176	0.0910587	0.091336	0.091761	0.0917712	0.0923955
0.136093	0.121373	0.110924	0.105625	0.105058	0.10472	0.105532	0.103123	0.102875	0.103661	0.10339	0.103048	0.103366	0.103745	0.104445	0.104995	0.104854	0.105023
0.124835	0.114303	0.110564	0.105473	0.105684	0.104886	0.104897	0.1038	0.104252	0.104648	0.104666	0.104199	0.105417	0.10511	0.105167	0.105971	0.105653	0.106111
0.0922399	0.0940259	0.0922259	0.0921539	0.0917107	0.0919418	0.092395	0.0922348	0.0923285	0.092597	0.0929208	0.0932327	0.0937288	0.093602	0.094229	0.0939845	0.094192	0.0945428
0.0607462	0.0685699	0.0700168	0.0724343	0.0736589	0.0741129	0.0738796	0.0742508	0.0742741	0.0740871	0.0744888	0.0749776	0.0753015	0.0749644	0.0752674	0.0751408	0.0755676	0.0753239
0.038334	0.0472791	0.0497228	0.0528072	0.0544382	0.0548351	0.0554022	0.0556472	0.0558686	0.0557272	0.055651	0.0562914	0.0562439	0.055792	0.0557329	0.0559976	0.0563765	0.0563262
0.0260785	0.0317508	0.0351556	0.0368502	0.038534	0.0387437	0.0392259	0.0398321	0.0401711	0.0401711	0.0398846	0.0401484	0.0403868	0.0400999	0.0399006	0.0399277	0.0400591	0.0402636
0.0166602	0.0213248	0.0245578	0.0262535	0.0272532	0.0276939	0.0280307	0.0285585	0.028526	0.0285091	0.0282821	0.0286192	0.0285427	0.0282072	0.0281455	0.0281433	0.0282458	0.0282498
0.01267	0.0149959	0.0170346	0.0188327	0.0198221	0.020095	0.020181	0.0203668	0.0203206	0.0202867	0.0202573	0.0205767	0.020264	0.0203027	0.0201497	0.0203675	0.0201026	0.0201553
0.00844669	0.0107369	0.0125722	0.013992	0.0145449	0.0148819	0.014738	0.0148473	0.0149866	0.0148936	0.014872	0.0151522	0.01496	0.0149407	0.0148417	0.0148672	0.0147953	0.014583
0.00741029	0.00754694	0.0099724	0.0105116	0.0108382	0.0112085	0.0111777	0.0113342	0.0112131	0.0112683	0.0114425	0.0113691	0.0112854	0.0112334	0.0113	0.011165	0.0110881	0.0110502
0.00494883	0.00619684	0.00755748	0.00840179	0.00857071	0.0086944	0.00860068	0.00882461	0.00887551	0.00892912	0.00879061	0.00885094	0.00882692	0.00882142	0.00885477	0.00864652	0.00856015	0.00870481

## Sheet: Copepods turbulence (velocity)
0.00737784	0.00999675	0.0114039	0.0118171	0.0134699	0.0140921	0.0150985	0.0152977	0.0163841	0.0170007	0.0168254	0.0175442	0.0184804	0.0188439	0.0188879	0.0189256	0.0192126	0.0191802
0.0091465	0.013011	0.0135143	0.015322	0.0174718	0.0172374	0.0184283	0.0188068	0.0197826	0.0206046	0.0206496	0.0206892	0.02167	0.0220564	0.0220628	0.0224043	0.0223465	0.0227405
0.0119764	0.0169359	0.0184881	0.0192531	0.0207445	0.0213988	0.022653	0.023453	0.0241251	0.0240771	0.0245553	0.0250628	0.025079	0.025565	0.025702	0.0258786	0.0255989	0.0256358
0.0179898	0.0224005	0.0239185	0.0245577	0.0267648	0.0272035	0.0281428	0.0289076	0.028751	0.0286232	0.0290252	0.028944	0.0291597	0.0296189	0.0299535	0.0297132	0.0294282	0.029494
0.0296124	0.0310311	0.0325085	0.0313938	0.0344069	0.033662	0.0346719	0.0348833	0.0337983	0.0338194	0.0335748	0.034324	0.0341984	0.0336768	0.0343468	0.034021	0.0337119	0.0335846
0.041993	0.0440638	0.0424437	0.0423347	0.0428132	0.0412647	0.0421278	0.0410042	0.0391266	0.0390028	0.0397016	0.0395862	0.0393438	0.0388345	0.0387009	0.0379921	0.0380069	0.0374082
0.0622063	0.0590047	0.0541561	0.0546096	0.0530338	0.0502368	0.0498127	0.048739	0.0465324	0.045264	0.0450973	0.0443826	0.0437418	0.0433774	0.0431443	0.0420079	0.0417466	0.0416065
0.0916671	0.0727963	0.0648442	0.0650847	0.060565	0.058723	0.0580191	0.0542469	0.0535933	0.0523086	0.0502685	0.0484611	0.0474578	0.0472839	0.047023	0.0459298	0.0462981	0.0455425
0.109404	0.0888214	0.0774823	0.0747705	0.0666671	0.0660562	0.0633256	0.0604418	0.0579973	0.0573523	0.0550371	0.0535907	0.0513606	0.0508983	0.0502224	0.049253	0.0495113	0.0482456
0.130173	0.0951101	0.0848504	0.0793016	0.0706748	0.0686979	0.066673	0.0629558	0.0623891	0.0610387	0.0577832	0.0551492	0.0544953	0.0532133	0.0517597	0.0510243	0.0505395	0.0494747
0.122593	0.0996639	0.0860105	0.0762703	0.0736791	0.0721303	0.0683115	0.063939	0.0632073	0.0602362	0.0581709	0.0559085	0.0552886	0.0540023	0.0528387	0.0521466	0.0510144	0.0498715
0.0906564	0.0842025	0.0800494	0.0724971	0.0670054	0.0674477	0.0640409	0.0608771	0.0602647	0.057996	0.0567793	0.0547065	0.0545916	0.0533017	0.0507857	0.0514271	0.0507373	0.0503212
0.0650867	0.0695218	0.0672508	0.0651163	0.0623851	0.0609627	0.0579346	0.0564826	0.0565827	0.0555207	0.0537976	0.0521699	0.0519433	0.0502419	0.0493107	0.0481598	0.0484873	0.0474019
0.0459851	0.0526293	0.0547239	0.0538123	0.0532263	0.05154	0.0507747	0.05072	0.0503993	0.0494586	0.0483054	0.047914	0.0474563	0.0461559	0.0452853	0.0456489	0.044864	0.0440627
0.0278943	0.0400087	0.0423943	0.0432109	0.0435541	0.0426562	0.0433364	0.0433821	0.0424685	0.0433202	0.0430971	0.0427811	0.0417519	0.041956	0.0412	0.0411262	0.041317	0.0405043
0.0197079	0.0274748	0.0310768	0.034054	0.0330127	0.0342628	0.0351864	0.0352505	0.0353781	0.0364619	0.0367532	0.0375337	0.0367681	0.0368558	0.0363803	0.0364379	0.0363482	0.0361061
0.0134418	0.0177383	0.0232644	0.0261602	0.0268815	0.0285862	0.0283401	0.0291918	0.0301237	0.0301732	0.0310254	0.0313298	0.0317043	0.0317329	0.0319736	0.0319063	0.0321047	0.0324306
0.0086917	0.013076	0.0169454	0.0195215	0.0211003	0.0221674	0.0228398	0.0237639	0.0248275	0.0251951	0.0256649	0.0263892	0.0266982	0.0270092	0.0273726	0.0277517	0.0274914	0.0282966
0.00667037	0.00930283	0.0123295	0.0149273	0.0164042	0.0176129	0.0182627	0.0194612	0.0198295	0.0204394	0.0216756	0.0222029	0.021839	0.0224342	0.0231211	0.0235881	0.023625	0.0239263
0.00480065	0.00769815	0.0102314	0.0119039	0.0133649	0.0138005	0.0144995	0.016272	0.0165492	0.0172252	0.0176307	0.0179023	0.0181572	0.019081	0.0194598	0.0191896	0.0198389	0.0202969

## Sheet: Carcasses turbulence (velocity)
0.0039104	0.00674497	0.00883286	0.01024	0.0119104	0.0131807	0.0142775	0.015538	0.0162256	0.017	0.0175845	0.0183244	0.0190655	0.0194529	0.0197279	0.0199281	0.0202596	0.0206073
0.0056568	0.00902758	0.0120238	0.013891	0.0157507	0.0168218	0.0179741	0.0192328	0.0199401	0.0210507	0.021431	0.0219956	0.0225576	0.022803	0.0231156	0.0232788	0.0236194	0.0237692
0.00912111	0.0129757	0.0159523	0.0186215	0.0204599	0.0212025	0.0224648	0.0239789	0.0246095	0.0252007	0.0258392	0.0259879	0.0266671	0.0265993	0.0271455	0.0271039	0.027395	0.0271317
0.0129841	0.0181026	0.0224082	0.0246077	0.0261539	0.0270549	0.0285139	0.0293678	0.0298907	0.0303755	0.0308438	0.0311091	0.0310652	0.0311885	0.0312479	0.0311078	0.0311854	0.0310884
0.0193527	0.0259751	0.0303531	0.0324313	0.0339043	0.034384	0.0352882	0.0357768	0.0359628	0.0363595	0.0364289	0.0363974	0.0358517	0.0359022	0.0357478	0.0356986	0.035298	0.035279
0.0303246	0.0381358	0.0404554	0.0419752	0.0434965	0.0435804	0.0436311	0.0436683	0.0432872	0.0425668	0.0422528	0.0418885	0.0412441	0.0407614	0.0406649	0.039958	0.0397904	0.039278
0.0471336	0.0540151	0.055721	0.0543444	0.054804	0.0537158	0.0527694	0.0515867	0.0504087	0.0494001	0.0488656	0.0476737	0.0468219	0.0459986	0.0455321	0.0444047	0.044055	0.0434456
0.0756074	0.0751124	0.0734237	0.0689647	0.0668935	0.0645916	0.0626126	0.0594994	0.0578885	0.0561154	0.0543778	0.0529991	0.0517129	0.0510726	0.0500176	0.0488593	0.0483269	0.0472934
0.119068	0.101831	0.0922965	0.0846465	0.0787224	0.0750951	0.0713984	0.0672632	0.0644452	0.0617972	0.0595228	0.0580485	0.0558885	0.0548192	0.053623	0.0528669	0.0513815	0.0507021
0.160004	0.124274	0.107865	0.0979887	0.0882963	0.0839396	0.0778848	0.0731056	0.0696455	0.066373	0.0635242	0.0613762	0.0592299	0.0577037	0.0562175	0.055474	0.0540475	0.0535715
0.168726	0.129859	0.112281	0.102614	0.0911659	0.0866942	0.0803329	0.0747883	0.0711382	0.068375	0.0656459	0.0631733	0.0609285	0.0590245	0.0575255	0.056994	0.0549581	0.0542918
0.124497	0.113786	0.100505	0.0951167	0.0878201	0.082274	0.0777006	0.0734299	0.069558	0.0670691	0.064394	0.062615	0.0607451	0.0588195	0.0573882	0.0562083	0.0548094	0.054131
0.0789104	0.0848719	0.0814357	0.0798739	0.0759161	0.0732439	0.0700841	0.0676124	0.0649939	0.0630849	0.0611233	0.0593027	0.0584624	0.056516	0.0554099	0.0541401	0.053237	0.0522745
0.0490509	0.058161	0.0614693	0.0622643	0.0623023	0.0614849	0.0600733	0.0595196	0.0581742	0.0567426	0.0557544	0.05435	0.0535147	0.0524059	0.0516967	0.0507668	0.0502549	0.0495483
0.0289199	0.040003	0.0439886	0.0464847	0.0484868	0.0489638	0.0497049	0.0501427	0.0497751	0.0494457	0.0487544	0.0483708	0.0479242	0.047351	0.0469158	0.0468394	0.0464299	0.0457918
0.0187358	0.0267623	0.0313358	0.0340222	0.0366204	0.0379056	0.0395853	0.0407486	0.0414217	0.0414972	0.0417278	0.0416538	0.0417378	0.0418077	0.0417325	0.0415133	0.041754	0.0411319
0.0115888	0.0179483	0.0221446	0.0254197	0.0275795	0.0291484	0.0310424	0.0323528	0.0334476	0.0342982	0.0349342	0.0352375	0.0353672	0.0359329	0.0362387	0.0361126	0.0361966	0.0362572
0.00808656	0.0117889	0.015876	0.0180486	0.0202336	0.0220849	0.0240454	0.0252973	0.0269997	0.0276603	0.0286456	0.0292589	0.0297201	0.0303192	0.0305267	0.0309195	0.0311372	0.0314383
0.0056568	0.00868341	0.0111682	0.0131391	0.015283	0.0168501	0.0185929	0.0198404	0.0211737	0.0222267	0.0231883	0.0239121	0.0247073	0.02529	0.0255236	0.0258577	0.0264458	0.0268057
0.00366363	0.00590234	0.00811375	0.00954685	0.0114319	0.0128134	0.0140326	0.0155634	0.0167425	0.0176564	0.0185629	0.0194262	0.0203057	0.0210618	0.0214224	0.0216164	0.0221103	0.0225246

## Sheet: Tracers turbulence (velocity)
0.000508905	0.00104286	0.00175274	0.00252505	0.00340555	0.00418432	0.00497957	0.00570211	0.00645472	0.00714233	0.0078549	0.00839258	0.00903542	0.00953058	0.0100194	0.0105322	0.0110124	0.0113976
0.000754377	0.00157042	0.00262368	0.00373336	0.00479525	0.00592535	0.00690502	0.0078393	0.00878761	0.0096692	0.0104741	0.0111914	0.0118405	0.0124923	0.0132179	0.0137903	0.0142647	0.0147783
0.00126328	0.00252651	0.00387968	0.00552172	0.00706296	0.0084337	0.00972196	0.0109205	0.0121193	0.0132466	0.0141664	0.0150315	0.0158538	0.0166973	0.0174084	0.018063	0.0186388	0.0192728
0.00219813	0.00408247	0.00624575	0.00831928	0.0103589	0.0123241	0.0139782	0.0154758	0.0170143	0.0183868	0.0194902	0.0205242	0.0215209	0.0224656	0.0232117	0.0239818	0.0245501	0.0250572
0.00398229	0.00699151	0.0104116	0.0132628	0.0159383	0.018358	0.020415	0.0224773	0.024181	0.0257855	0.0269923	0.0282151	0.0293189	0.0302243	0.0310195	0.0317774	0.0323369	0.0328693
0.00781319	0.0127474	0.0175712	0.0215376	0.0251723	0.0280595	0.0307184	0.0331337	0.0350707	0.0367343	0.0380861	0.0392853	0.0401606	0.0408458	0.0414394	0.0421089	0.0424616	0.0428739
0.0168734	0.0256573	0.0319065	0.0373011	0.0410327	0.0449835	0.0477322	0.0495399	0.0510266	0.0526011	0.0534079	0.0539553	0.0544649	0.0546109	0.0544938	0.0547259	0.0546765	0.0545845
0.0415489	0.0542118	0.0621406	0.0677212	0.0703128	0.0727419	0.0740908	0.0740449	0.0743905	0.0736686	0.0731185	0.0722786	0.0715056	0.0706769	0.0699221	0.0691672	0.0686148	0.0675565
0.115203	0.123892	0.125202	0.122186	0.117972	0.114569	0.110453	0.106512	0.102519	0.0981667	0.095397	0.0923387	0.0893946	0.0873681	0.0851518	0.0831732	0.081505	0.0800561
0.291287	0.247827	0.215467	0.191418	0.173022	0.15734	0.144114	0.134515	0.126603	0.119438	0.113307	0.107996	0.103624	0.100346	0.0968591	0.0935552	0.0911245	0.088993
0.319426	0.269012	0.234505	0.206663	0.187261	0.167828	0.154618	0.143245	0.133952	0.125895	0.119398	0.114319	0.109266	0.104887	0.101397	0.0978402	0.0952686	0.092871
0.12643	0.139756	0.142915	0.142964	0.139501	0.134761	0.129358	0.124091	0.118886	0.114413	0.110081	0.10596	0.102637	0.0991654	0.0965023	0.0941148	0.0917668	0.0896575
0.042122	0.0573207	0.068585	0.0757062	0.0813456	0.0854475	0.0879764	0.0887783	0.08887	0.0885023	0.0881557	0.0872727	0.0860848	0.0846588	0.0834116	0.0821739	0.0810215	0.079855
0.0154493	0.0248384	0.0325483	0.0394258	0.0446253	0.049807	0.054035	0.0574776	0.0597256	0.0616463	0.063004	0.0642492	0.0652652	0.0655873	0.0660535	0.0660024	0.0659686	0.0659636
0.00667821	0.0114587	0.016741	0.0219988	0.0256768	0.0293546	0.0327417	0.0360489	0.0383741	0.0409846	0.0428242	0.0445748	0.0460592	0.0476053	0.0486626	0.0496871	0.050528	0.0511338
0.00300896	0.00584919	0.00889117	0.0123752	0.0153097	0.0182513	0.0205657	0.022969	0.0251705	0.0272241	0.0289085	0.0306038	0.0321995	0.0334231	0.0347332	0.036084	0.0369425	0.0379611
0.00158146	0.00315223	0.0050297	0.00717141	0.00929363	0.0114148	0.0134372	0.0151157	0.0167583	0.0183558	0.0197888	0.0211653	0.0224834	0.0236097	0.0245622	0.0256335	0.026647	0.0275537
0.00083221	0.00180002	0.00297613	0.00439109	0.00591998	0.00744958	0.00876847	0.0101157	0.0114325	0.0125487	0.0136735	0.0147953	0.0156684	0.0167322	0.0176271	0.0183604	0.019162	0.0198778
0.000507195	0.00105688	0.00191932	0.00279645	0.00382679	0.00498526	0.00593355	0.00686877	0.00789064	0.00885415	0.00969446	0.0104582	0.0112801	0.0119508	0.0126666	0.013324	0.0138829	0.0144209
0.000298501	0.000680047	0.00121116	0.00180764	0.00254592	0.00333031	0.00411899	0.00479169	0.0054686	0.00629135	0.00692402	0.00753008	0.00811365	0.00863508	0.0091683	0.0096811	0.0101204	0.0105723

## Sheet: Copepods calm water (angle)
0.353802	0.405371	0.428523	0.452505	0.456761	0.461639	0.453488	0.456053	0.463155	0.45908	0.461145	0.458734	0.450683	0.450672	0.446128	0.439113	0.438222	0.433559
0.456018	0.478669	0.481981	0.49494	0.481812	0.47442	0.46583	0.471352	0.468995	0.469709	0.467026	0.465769	0.461524	0.460004	0.457626	0.452242	0.45397	0.448741
0.526234	0.517681	0.510147	0.512081	0.491378	0.488007	0.481512	0.47986	0.479282	0.478539	0.478519	0.477488	0.474224	0.473106	0.467567	0.468741	0.463426	0.463379
0.586993	0.553883	0.52932	0.510573	0.501039	0.49689	0.494971	0.495687	0.485822	0.486945	0.486401	0.483127	0.478959	0.480946	0.480685	0.478853	0.477622	0.474894
0.606037	0.562145	0.541326	0.525952	0.511499	0.500215	0.501508	0.501643	0.493478	0.498205	0.495231	0.493444	0.489026	0.490571	0.492298	0.491699	0.491256	0.487388
0.631947	0.5739	0.543518	0.521204	0.515925	0.507662	0.509848	0.51099	0.504532	0.502344	0.505028	0.502516	0.498282	0.502986	0.503805	0.503844	0.502026	0.503155
0.637647	0.583099	0.549521	0.533671	0.51644	0.515923	0.516478	0.515855	0.512319	0.513183	0.508557	0.507852	0.512307	0.515094	0.51232	0.5163	0.514272	0.519492
0.650602	0.583909	0.558194	0.526236	0.518963	0.518132	0.520898	0.519799	0.51998	0.51535	0.51655	0.51775	0.518569	0.525277	0.523404	0.525684	0.527188	0.533393
0.651121	0.593662	0.559222	0.530088	0.523809	0.528649	0.528233	0.519085	0.522966	0.520311	0.523215	0.522111	0.525922	0.527149	0.533107	0.536026	0.539057	0.540276
0.626765	0.580203	0.550731	0.52631	0.526405	0.523474	0.530287	0.518541	0.521412	0.526647	0.526918	0.525666	0.52987	0.531433	0.537109	0.541864	0.545264	0.543977
0.621324	0.573772	0.552602	0.53406	0.528434	0.527309	0.528489	0.522397	0.528652	0.527255	0.528109	0.528163	0.53548	0.536014	0.53855	0.543312	0.54244	0.545677
0.618474	0.556821	0.543814	0.520203	0.528729	0.524885	0.523819	0.516699	0.523233	0.526816	0.530297	0.531019	0.533963	0.534196	0.539696	0.541226	0.542262	0.545769
0.556419	0.544811	0.534022	0.520233	0.521391	0.521624	0.524625	0.514991	0.521819	0.521218	0.523363	0.524481	0.529831	0.531143	0.535929	0.535304	0.538234	0.543349
0.532971	0.530799	0.518022	0.518486	0.516272	0.517669	0.515098	0.514354	0.517883	0.516475	0.51697	0.520253	0.525189	0.522834	0.526142	0.525071	0.52618	0.531377
0.487887	0.513167	0.510558	0.509587	0.50988	0.512733	0.508818	0.514903	0.513173	0.513086	0.511939	0.512262	0.516715	0.514682	0.511942	0.516421	0.517977	0.514957
0.43516	0.47786	0.503345	0.506706	0.496876	0.507176	0.508593	0.505095	0.504024	0.506896	0.504802	0.508178	0.508102	0.504187	0.502981	0.502206	0.507329	0.5024
0.378935	0.439784	0.471207	0.490475	0.498127	0.500063	0.497431	0.499651	0.495974	0.495959	0.495254	0.499412	0.496591	0.492234	0.493588	0.49157	0.490706	0.489427
0.300687	0.391828	0.447537	0.467302	0.48957	0.486963	0.486575	0.494734	0.490751	0.48717	0.487569	0.488736	0.483198	0.480829	0.479067	0.477074	0.476375	0.476331
0.211685	0.316742	0.377988	0.439978	0.464309	0.466837	0.469176	0.479674	0.476349	0.475596	0.471179	0.471459	0.470287	0.468585	0.46591	0.462238	0.461548	0.459292
0.129291	0.221894	0.288421	0.359409	0.402381	0.41973	0.434323	0.448637	0.456203	0.459215	0.461926	0.461578	0.46128	0.45806	0.452145	0.451211	0.444648	0.443166

## Sheet: Copepods turbulence (angle)
0.340593	0.358669	0.378155	0.376931	0.403864	0.392458	0.416803	0.410309	0.397895	0.399175	0.397702	0.40203	0.401504	0.399746	0.404937	0.406249	0.401569	0.405101
0.368386	0.405508	0.422709	0.443318	0.447733	0.434072	0.444639	0.431363	0.427075	0.418084	0.424941	0.42539	0.424592	0.422869	0.424648	0.429098	0.434145	0.427231
0.452777	0.454299	0.463807	0.440634	0.458351	0.456734	0.448762	0.44232	0.448393	0.436272	0.440081	0.446943	0.443661	0.448778	0.44926	0.451767	0.447919	0.449342
0.501289	0.515234	0.484048	0.469999	0.476902	0.477453	0.462539	0.467697	0.47432	0.459924	0.460287	0.469789	0.468483	0.475411	0.468251	0.473173	0.468513	0.465265
0.592754	0.53822	0.507004	0.49005	0.508462	0.493754	0.4933	0.491298	0.486716	0.482813	0.478861	0.488938	0.490918	0.488888	0.493828	0.495126	0.487665	0.482802
0.607408	0.547761	0.520333	0.514363	0.522171	0.519331	0.516097	0.51487	0.498743	0.504008	0.514634	0.506197	0.508134	0.50333	0.501722	0.502589	0.503169	0.504327
0.655415	0.595251	0.528355	0.566068	0.524271	0.520701	0.527267	0.536576	0.52393	0.524399	0.529348	0.526208	0.524979	0.520853	0.526713	0.513432	0.516686	0.52097
0.658447	0.571614	0.571182	0.570488	0.540489	0.546411	0.545836	0.540603	0.537288	0.554953	0.5369	0.534299	0.538754	0.535335	0.538677	0.52866	0.534828	0.539219
0.672091	0.605877	0.581425	0.574277	0.553556	0.561033	0.552285	0.546052	0.554909	0.568949	0.555603	0.546302	0.540712	0.553608	0.553696	0.540991	0.550292	0.549126
0.667543	0.605009	0.567356	0.578303	0.547606	0.550873	0.56659	0.566277	0.568661	0.5695	0.564101	0.552868	0.556207	0.553206	0.558315	0.554049	0.554608	0.552998
0.633685	0.609563	0.581796	0.571435	0.567207	0.576142	0.567753	0.560828	0.570017	0.565879	0.563229	0.560179	0.560834	0.55823	0.557912	0.55538	0.555206	0.552364
0.638233	0.588095	0.575748	0.558884	0.54603	0.568676	0.565956	0.555054	0.565753	0.556181	0.564583	0.552387	0.564378	0.557774	0.551301	0.554127	0.550354	0.556121
0.613977	0.561856	0.576489	0.549885	0.542997	0.552154	0.548303	0.550582	0.568809	0.553217	0.551298	0.549867	0.559143	0.550794	0.54948	0.547615	0.541978	0.54706
0.53464	0.538437	0.535884	0.539071	0.538038	0.52958	0.527479	0.539655	0.543548	0.541021	0.540611	0.541495	0.54694	0.540841	0.537211	0.537981	0.544873	0.54042
0.498257	0.524124	0.534403	0.537965	0.537455	0.509878	0.518317	0.521148	0.51284	0.528189	0.525322	0.539107	0.52704	0.520263	0.520847	0.525382	0.529759	0.526659
0.444691	0.49897	0.508732	0.508837	0.50992	0.500689	0.496471	0.503469	0.495515	0.504199	0.501182	0.510326	0.51454	0.510872	0.502187	0.509381	0.514378	0.51607
0.378493	0.457118	0.494786	0.48634	0.481044	0.482754	0.478536	0.477321	0.481418	0.494988	0.486876	0.479024	0.476164	0.492411	0.486337	0.494387	0.492198	0.495141
0.311284	0.407243	0.454921	0.454291	0.456659	0.473565	0.460601	0.470688	0.461628	0.461004	0.473925	0.472475	0.470367	0.469476	0.479603	0.478152	0.474571	0.47474
0.257719	0.341321	0.394816	0.405744	0.437408	0.444321	0.446613	0.445133	0.444598	0.440909	0.446687	0.455365	0.450289	0.457406	0.457289	0.45791	0.46022	0.455838
0.172318	0.275832	0.31805	0.363117	0.399839	0.409422	0.415852	0.428757	0.437944	0.436336	0.443829	0.440809	0.432362	0.439909	0.437785	0.44455	0.437071	0.439205

## Sheet: Carcasses turbulence (angle)
0.253417	0.294089	0.335926	0.334162	0.355487	0.354715	0.353844	0.358567	0.360325	0.362401	0.366445	0.365907	0.372249	0.377046	0.379198	0.379141	0.381131	0.381067
0.303721	0.352954	0.371096	0.382566	0.387905	0.383618	0.381533	0.390519	0.389091	0.396395	0.394493	0.396319	0.400552	0.402337	0.405239	0.404793	0.403836	0.408967
0.371393	0.405371	0.417457	0.413376	0.422243	0.417994	0.413709	0.42081	0.422534	0.420246	0.422824	0.421899	0.422389	0.425653	0.426971	0.428557	0.431368	0.43084
0.436598	0.452843	0.455887	0.439781	0.454649	0.447511	0.448352	0.444056	0.446445	0.447623	0.449265	0.447344	0.447307	0.448759	0.454406	0.452323	0.455375	0.456051
0.487472	0.479269	0.494571	0.469839	0.479676	0.476446	0.480826	0.476064	0.476065	0.474771	0.473249	0.475375	0.478411	0.476788	0.479681	0.475909	0.478342	0.47742
0.533125	0.530499	0.525093	0.513175	0.516856	0.511396	0.504364	0.506558	0.502484	0.502931	0.502129	0.502168	0.501553	0.501586	0.501298	0.49717	0.499597	0.496966
0.575361	0.572155	0.540747	0.539414	0.527626	0.534163	0.535825	0.534323	0.532757	0.534177	0.524515	0.530177	0.525583	0.520606	0.522002	0.520724	0.519374	0.516189
0.622627	0.572511	0.568008	0.56018	0.550958	0.556397	0.560256	0.551943	0.553529	0.552168	0.549626	0.551088	0.544147	0.544321	0.542026	0.540007	0.538237	0.536849
0.661162	0.586041	0.58142	0.583262	0.572573	0.575297	0.577422	0.571624	0.56978	0.567148	0.571829	0.569562	0.56219	0.563296	0.558022	0.561321	0.555911	0.554027
0.694666	0.612586	0.596102	0.60099	0.58226	0.590944	0.593134	0.585109	0.585796	0.578919	0.580913	0.578013	0.575227	0.574472	0.568342	0.57088	0.567276	0.571464
0.681663	0.602102	0.60038	0.604644	0.585864	0.596684	0.597455	0.590604	0.587764	0.587026	0.589926	0.586287	0.58037	0.577694	0.575028	0.58158	0.573002	0.574888
0.674165	0.598423	0.587339	0.608629	0.582796	0.592558	0.587445	0.589769	0.585191	0.585558	0.586212	0.582122	0.584304	0.579515	0.578632	0.577798	0.575516	0.576935
0.639617	0.604397	0.584194	0.596945	0.574461	0.578511	0.579257	0.576564	0.578433	0.580095	0.577073	0.573418	0.579325	0.574483	0.57031	0.569284	0.571971	0.57016
0.590926	0.592806	0.56165	0.573954	0.564731	0.561661	0.564001	0.563893	0.560662	0.559526	0.560885	0.562064	0.56108	0.559386	0.557391	0.554794	0.557875	0.558537
0.567578	0.56907	0.547799	0.545414	0.545197	0.536997	0.541956	0.540243	0.537883	0.537096	0.542499	0.541349	0.540413	0.536964	0.539585	0.537652	0.543376	0.540674
0.509776	0.528798	0.51189	0.520273	0.514164	0.510629	0.517146	0.513444	0.515875	0.515222	0.511691	0.515247	0.513512	0.517525	0.517546	0.518332	0.517202	0.520717
0.468964	0.499602	0.482709	0.481252	0.492248	0.483034	0.485388	0.484984	0.48882	0.487703	0.485587	0.490911	0.490056	0.491043	0.495316	0.495783	0.496198	0.495419
0.395501	0.453436	0.456072	0.455524	0.466792	0.459855	0.456243	0.457115	0.458869	0.461364	0.463291	0.459128	0.465809	0.465081	0.464718	0.469254	0.469023	0.468215
0.309985	0.385749	0.423445	0.415466	0.431125	0.432454	0.424675	0.435193	0.434431	0.436735	0.433688	0.437803	0.436763	0.441305	0.444394	0.442883	0.444273	0.444104
0.222285	0.307302	0.358216	0.361153	0.392389	0.399135	0.397169	0.408617	0.413268	0.412895	0.413856	0.413819	0.418757	0.422137	0.419896	0.421814	0.421119	0.420509

[truncated: 1 more sheets: Tracers turbulence (angle)]
