# Supplementary material for: Efficient mate finding in planktonic copepods swimming in turbulence
Source: eLife. 2020 Nov 25;9:e62014. doi: 10.7554/eLife.62014 (PMC7688315; doi:10.7554/eLife.62014)
Supplement: Figure 5—source data 1. [file elife-62014-fig5-data1.xlsx]

## Sheet: Copepods in calm water
	Separation (mm)	Correlation
	1.25	1.0912
	1.75	1.062
	2.25	1.0483
	2.75	1.0395
	3.25	1.031
	3.75	1.0253
	4.25	1.0222
	4.75	1.0185
	5.25	1.0147
	5.75	1.0109
	6.25	1.0109
	6.75	1.0097
	7.25	1.0074
	7.75	1.0052
	8.25	1.004
	8.75	1.0009
	9.25	1
	9.75	0.9994

## Sheet: Copepods in turbulence
	Separation (mm)	Correlation
	1.25	1.057
	1.75	1.026
	2.25	1.0161
	2.75	1.011
	3.25	1.0084
	3.75	1.0076
	4.25	1.0072
	4.75	1.007
	5.25	1.0062
	5.75	1.005
	6.25	1.0037
	6.75	1.0034
	7.25	1.003
	7.75	1.0026
	8.25	1.0027
	8.75	1.0025
	9.25	1.0014
	9.75	1.0007

## Sheet: Carcasses in turbulence
	Separation (mm)	Correlation
	1.25	1.0216
	1.75	1.0105
	2.25	1.0065
	2.75	1.0046
	3.25	1.0035
	3.75	1.0027
	4.25	1.0023
	4.75	1.002
	5.25	1.0017
	5.75	1.0017
	6.25	1.0015
	6.75	1.0013
	7.25	1.0012
	7.75	1.001
	8.25	1.0009
	8.75	1.0009
	9.25	1.0009
	9.75	1.001

## Sheet: Tracers in turbulence
	Separation (mm)	Correlation
	1.25	1.0037
	1.75	1.0018
	2.25	1.0011
	2.75	1.0007
	3.25	1.0005
	3.75	1.0003
	4.25	1.0003
	4.75	1.0002
	5.25	1.0001
	5.75	1.0001
	6.25	1.0001
	6.75	1
	7.25	1
	7.75	1
	8.25	1
	8.75	1
	9.25	1.0001
	9.75	1
